# Supplementary material for: Association of the NCAN-TM6SF2-CILP2-PBX4-SUGP1-MAU2 SNPs and gene-gene and gene-environment interactions with serum lipid levels
Source: publisher site journal article supplement (doi:10.18632/aging.103361), 2020-06-22
Supplement: Supplementary file [file aging-v12i12-103361-supplementary-material-SD1.pdf]

## SUPPLEMENTARY TABLES

Supplementary Table 1. Characteristics of the 19p13.11 gene mutations.

| SNV ID (rs#)  | HGVS Name                       | Chr: Position | Contig       | Contig Pos | SNP to Chr | Allele | MAF/Minor                       | Map Methods |
|---------------|---------------------------------|---------------|--------------|------------|------------|--------|---------------------------------|-------------|
| <b>NCAN</b>   |                                 |               |              |            |            |        |                                 |             |
| rs2238675     | NM_004386.2:<br>c.1072+529 C>T  | 19:19225799   | NT_011295.12 | 19165799   | Fwd        | T      | T=0.0960/481<br>(1000 Genomes)  | mapup       |
| rs2228603     | NM_004386.2: c.274<br>C>T       | 19:19159115   | NT_011295.12 | 19159115   | Fwd        | C      | T=0.0439/220<br>(1000 Genomes)  | mapup       |
| <b>TM6SF2</b> |                                 |               |              |            |            |        |                                 |             |
| rs58542926    | NM_001001524.2:<br>c.499 C>T    | 19: 19208740  | NT_011295.12 | 19208740   | Fwd        | T      | T=0.0667/334<br>(1000 Genomes)  | mapup       |
| rs735273      | NN_001001524.2: c.-<br>1387 A>G | 19:19214602   | NT_011295.12 | 19214602   | Fwd        | G      | C=0.4655/2331<br>(1000 Genomes) | mapup       |
| <b>CILP2</b>  |                                 |               |              |            |            |        |                                 |             |
| rs16996148    | NC_000019.9:<br>g.19658472 G>T  | 19: 19487663  | NT_011295.12 | 19487663   | Fwd        | G      | T=0.1156/579<br>(1000 Genomes)  | mapup       |
| rs17216525    | NC_000019.9:<br>g.19662220 C>T  | 19: 19491411  | NT_011295.12 | 19491411   | Fwd        | C      | T=0.0815/408<br>(1000 Genomes)  | mapup       |
| <b>PBX4</b>   |                                 |               |              |            |            |        |                                 |             |
| rs12610185    | NM_025245.2:<br>c.119+7598 C>T  | 19: 19550913  | NT_011295.12 | 19550913   | Fwd        | C      | T=0.1132/567<br>(1000 Genomes)  | mapup       |
| <b>SUGPI</b>  |                                 |               |              |            |            |        |                                 |             |
| rs10401969    | NM_172231.3:<br>c.1243+80 A>G   | 19: 19236909  | NT_011295.12 | 19236909   | Fwd        | A      | G=0.1176/589<br>(1000 Genomes)  | mapup       |
| <b>MAU2</b>   |                                 |               |              |            |            |        |                                 |             |
| rs73001065    | NM_015329.3:<br>c.1548+296 G>C  | 19: 19289732  | NT_011295.12 | 19289732   | Fwd        | G      | C=0.0319/160<br>(1000 Genomes)  | mapup       |
| rs8102280     | NM_015329.3:<br>c.1155+15 G>A   | 19: 19284941  | NT_011295.12 | 19284941   | Fwd        | G      | A=0.0333/167<br>(1000 Genomes)  | mapup       |
| rs150268548   | NC_000019.9:<br>g.19494483 G>A  | 19: 19323674  | NT_011295.12 | 19323674   | Fwd        | G      | A=0.0260/130<br>(1000 Genomes)  | mapup       |
| rs968525      | NM_015329.3: c.1309-<br>483 C>T | 19: 19288406  | NT_011295.12 | 19288406   | Rev        | C      | T=0.3033/1519<br>(1000 Genomes) | mapup       |

**Supplementary Table 2. The sequences of forward and backward primers of the 19p13.11 gene mutations.**

| <b>Gene</b>          | <b>Primer sequence</b>                                     |
|----------------------|------------------------------------------------------------|
| <b><i>NCAN</i></b>   |                                                            |
| rs2238675            | TGGAAGAGATAATGCCTCAATTGGC<br>GGTAGTGTCCAACCTCATGAACTTG     |
| rs2228603            | TCCAACCCAGGCACACAGGATAT<br>GCCACCCTCACGACATTGTC            |
| <b><i>TM6SF2</i></b> |                                                            |
| rs58542926           | CCCTCCCTTCTTTCTTGTGACA<br>CCTGCACCATGGAAGGCAAATA           |
| rs735273             | CTGCAGCTGGCACAAATTCTAAC<br>CCCGCTTACAAGAAGGCTCATTTTA       |
| <b><i>CILP2</i></b>  |                                                            |
| rs16996148           | CCGATCTCATCATTACCCATC<br>GTCCACCCTAGGGCAAAGGAAG            |
| rs17216525           | CAGCCAGGAGGGATAGAAGATACT<br>CTTCTTTGAGCTGCACCATTCTG        |
| <b><i>PBX4</i></b>   |                                                            |
| rs12610185           | TGTCAAACAACAAAAACCAACACAATT<br>GGGAATTTATGATGTGGAATTTCCAGA |
| <b><i>SUGP1</i></b>  |                                                            |
| rs10401969           | ATTGCAATAGGCCAGCAATTCC<br>TTGGAAGGGTCTGACTTCTTTCAC         |
| <b><i>MAU2</i></b>   |                                                            |
| rs73001065           | GCATGGCACTGTTTCATCCTATG<br>CCCTCAGGTGTCAACACATAGC          |
| rs8102280            | CAGTTTGGTCAGACAGGACATG<br>GAATGTTCTGGATCTGGTTAGGTACTTAC    |
| rs150268548          | GGCAAATGGGCTGCTTTTCT<br>GCCTCAGCCCTAGGACAATG               |
| rs968525             | AACCTGTCTCAAAGGAAAAAGAAAGCC<br>GGCGTGATCTGACTGATAATTTAGCT  |
